# Supplementary material for: Effects of Residue Management on Decomposition in Irrigated Rice Fields Are Not Related to Changes in the Decomposer Community
Source: PLoS One. 2015 Jul 30;10(7):e0134402. doi: 10.1371/journal.pone.0134402 (PMC4520592; doi:10.1371/journal.pone.0134402)
Supplement: S2 File — (XLSX) [file pone.0134402.s007.xlsx]

## Sheet: Litterbag Straw
Mesh size of litterbags	Block	Treatment	Days after setting of litterbags	Replicate	Pair number of fine and coarse bags of one unit	Date of litterbag setting	Date of litterbag retrieval	Average weight of straw filled in litterbags (g)	Weight of straw after retrieval (g)	Average nitrogen content of straw filled in litterbags (%)	Nitrogen content in straw after retrieval (%)	Average carbon content of straw filled in litterbags (%)	Carbon content in straw after retrieval (%)
coarse	1	Ash scattered	25	1	1	2013-01-16	2013-02-09	9.351	2.29	0.599333	0.8	36.7967	44.13
coarse	1	Ash scattered	25	2	2	2013-01-16	2013-02-09	9.351	2.882	0.599333	0.72	36.7967	41.95
coarse	1	Ash scattered	25	3	3	2013-01-16	2013-02-09	9.351	2.458	0.599333	0.678	36.7967	44.19
coarse	1	Ash mixed in	25	1	4	2013-01-16	2013-02-09	9.351	3.207	0.599333	0.85	36.7967	40.81
coarse	1	Ash mixed in	25	2	5	2013-01-16	2013-02-09	9.351	2.899	0.599333	0.813	36.7967	41.77
coarse	1	Ash mixed in	25	3	6	2013-01-16	2013-02-09	9.351	3.033	0.599333	0.824	36.7967	40.66
coarse	1	Straw scattered	25	1	7	2013-01-16	2013-02-09	9.351	4.648	0.599333	0.839	36.7967	38.55
coarse	1	Straw scattered	25	2	8	2013-01-16	2013-02-09	9.351	3.932	0.599333	0.6575	36.7967	39.265
coarse	1	Straw scattered	25	3	9	2013-01-16	2013-02-09	9.351	4.552	0.599333	0.869	36.7967	40.05
coarse	1	Straw mixed in	25	1	10	2013-01-16	2013-02-09	9.351	3.685	0.599333	0.631	36.7967	40.35
coarse	1	Straw mixed in	25	2	11	2013-01-16	2013-02-09	9.351	2.714	0.599333	0.956	36.7967	42.81
coarse	1	Straw mixed in	25	3	12	2013-01-16	2013-02-09	9.351	2.84	0.599333	0.701	36.7967	41
coarse	1	Control	25	1	13	2013-01-16	2013-02-09	9.351	2.772	0.599333	0.771	36.7967	43.9
coarse	1	Control	25	2	14	2013-01-16	2013-02-09	9.351	2.734	0.599333	0.917	36.7967	41.42
coarse	1	Control	25	3	15	2013-01-16	2013-02-09	9.351	2.5	0.599333	0.801	36.7967	43.31
coarse	2	Ash scattered	25	1	16	2013-01-16	2013-02-09	9.351	2.129	0.599333	0.916	36.7967	43.54
coarse	2	Ash scattered	25	2	17	2013-01-16	2013-02-09	9.351	2.017	0.599333	1.075	36.7967	44.03
coarse	2	Ash scattered	25	3	18	2013-01-16	2013-02-09	9.351	2.26	0.599333	0.882	36.7967	41.86
coarse	2	Ash mixed in	25	1	19	2013-01-16	2013-02-09	9.351	2.311	0.599333	1.294	36.7967	42.61
coarse	2	Ash mixed in	25	2	20	2013-01-16	2013-02-09	9.351	1.895	0.599333	1.073	36.7967	42.28
coarse	2	Ash mixed in	25	3	21	2013-01-16	2013-02-09	9.351	2.7	0.599333	1.214	36.7967	42.15
coarse	2	Straw scattered	25	1	22	2013-01-16	2013-02-09	9.351	3.233	0.599333	0.734	36.7967	38.62
coarse	2	Straw scattered	25	2	23	2013-01-16	2013-02-09	9.351	4.061	0.599333	0.799	36.7967	39.29
coarse	2	Straw scattered	25	3	24	2013-01-16	2013-02-09	9.351	4.067	0.599333	0.707	36.7967	40.16
coarse	2	Straw mixed in	25	1	25	2013-01-16	2013-02-09	9.351	2.847	0.599333	0.833	36.7967	42.22
coarse	2	Straw mixed in	25	2	26	2013-01-16	2013-02-09	9.351	2.477	0.599333	0.956	36.7967	42.45
coarse	2	Straw mixed in	25	3	27	2013-01-16	2013-02-09	9.351	2.74	0.599333	0.726	36.7967	41.59
coarse	2	Control	25	1	28	2013-01-16	2013-02-09	9.351	2.477	0.599333	0.887	36.7967	41.83
coarse	2	Control	25	2	29	2013-01-16	2013-02-09	9.351	2.073	0.599333	0.908	36.7967	43.91
coarse	2	Control	25	3	30	2013-01-16	2013-02-09	9.351	2.79	0.599333	0.993	36.7967	43.56
coarse	3	Ash scattered	25	1	31	2013-01-16	2013-02-09	9.351	2.653	0.599333	1.131	36.7967	42.03
coarse	3	Ash scattered	25	2	32	2013-01-16	2013-02-09	9.351	2.748	0.599333	0.763	36.7967	42.21
coarse	3	Ash scattered	25	3	33	2013-01-16	2013-02-09	9.351	3.128	0.599333	0.844	36.7967	43.07
coarse	3	Ash mixed in	25	1	34	2013-01-16	2013-02-09	9.351	2.57	0.599333	1.123	36.7967	42.59
coarse	3	Ash mixed in	25	2	35	2013-01-16	2013-02-09	9.351	2.761	0.599333	1.276	36.7967	41.72
coarse	3	Ash mixed in	25	3	36	2013-01-16	2013-02-09	9.351	2.364	0.599333	1.07	36.7967	42.33
coarse	3	Straw scattered	25	1	37	2013-01-16	2013-02-09	9.351	4.09	0.599333	0.741	36.7967	39
coarse	3	Straw scattered	25	2	38	2013-01-16	2013-02-09	9.351	3.151	0.599333	0.742	36.7967	41.91
coarse	3	Straw scattered	25	3	39	2013-01-16	2013-02-09	9.351	3.915	0.599333	0.897	36.7967	41.91
coarse	3	Straw mixed in	25	1	40	2013-01-16	2013-02-09	9.351	2.149	0.599333	1.0435	36.7967	41.63
coarse	3	Straw mixed in	25	2	41	2013-01-16	2013-02-09	9.351	2.398	0.599333	1.23	36.7967	42.3
coarse	3	Straw mixed in	25	3	42	2013-01-16	2013-02-09	9.351	2.205	0.599333	0.935	36.7967	43.2
coarse	3	Control	25	1	43	2013-01-16	2013-02-09	9.351	2.406	0.599333	0.8935	36.7967	42.355
coarse	3	Control	25	2	44	2013-01-16	2013-02-09	9.351	2.242	0.599333	0.9595	36.7967	42.415
coarse	3	Control	25	3	45	2013-01-16	2013-02-09	9.351	2.709	0.599333	0.941	36.7967	42.29
coarse	4	Ash scattered	25	1	46	2013-01-16	2013-02-09	9.351	2.456	0.599333	0.982	36.7967	41.71
coarse	4	Ash scattered	25	2	47	2013-01-16	2013-02-09	9.351	2.796	0.599333	0.874	36.7967	43.62
coarse	4	Ash scattered	25	3	48	2013-01-16	2013-02-09	9.351	2.353	0.599333	1.03	36.7967	44.2
coarse	4	Ash mixed in	25	1	49	2013-01-16	2013-02-09	9.351	2.159	0.599333	0.965	36.7967	43.5
coarse	4	Ash mixed in	25	2	50	2013-01-16	2013-02-09	9.351	2.995	0.599333	0.818	36.7967	42.34
coarse	4	Ash mixed in	25	3	51	2013-01-16	2013-02-09	9.351	2.527	0.599333	0.931	36.7967	44.18
coarse	4	Straw scattered	25	1	52	2013-01-16	2013-02-09	9.351	3.717	0.599333	0.878	36.7967	42.74
coarse	4	Straw scattered	25	2	53	2013-01-16	2013-02-09	9.351	3.561	0.599333	0.726	36.7967	41.94
coarse	4	Straw scattered	25	3	54	2013-01-16	2013-02-09	9.351	3.591	0.599333	0.676	36.7967	41.82
coarse	4	Straw mixed in	25	1	55	2013-01-16	2013-02-09	9.351	2.834	0.599333	0.789	36.7967	41.71
coarse	4	Straw mixed in	25	2	56	2013-01-16	2013-02-09	9.351	2.762	0.599333	0.851	36.7967	43.18
coarse	4	Straw mixed in	25	3	57	2013-01-16	2013-02-09	9.351	3.161	0.599333	0.753	36.7967	41.42
coarse	4	Control	25	1	58	2013-01-16	2013-02-09	9.351	2.914	0.599333	0.841	36.7967	42.11
coarse	4	Control	25	2	59	2013-01-16	2013-02-09	9.351	3.125	0.599333	0.995	36.7967	43.71
coarse	4	Control	25	3	60	2013-01-16	2013-02-09	9.351	2.956	0.599333	0.861	36.7967	42.41
coarse	5	Ash scattered	25	1	61	2013-01-16	2013-02-09	9.351	2.366	0.599333	0.933	36.7967	42.9
coarse	5	Ash scattered	25	2	62	2013-01-16	2013-02-09	9.351	2.274	0.599333	0.992	36.7967	43.33
coarse	5	Ash scattered	25	3	63	2013-01-16	2013-02-09	9.351	2.704	0.599333	0.822	36.7967	43.01
coarse	5	Ash mixed in	25	1	64	2013-01-16	2013-02-09	9.351	1.785	0.599333	1.069	36.7967	44.4
coarse	5	Ash mixed in	25	2	65	2013-01-16	2013-02-09	9.351	2.139	0.599333	1.064	36.7967	42.97
coarse	5	Ash mixed in	25	3	66	2013-01-16	2013-02-09	9.351	2.366	0.599333	0.813	36.7967	40.53
coarse	5	Straw scattered	25	1	67	2013-01-16	2013-02-09	9.351	3.687	0.599333	0.676	36.7967	40.3
coarse	5	Straw scattered	25	2	68	2013-01-16	2013-02-09	9.351	3.231	0.599333	0.7	36.7967	41.59
coarse	5	Straw scattered	25	3	69	2013-01-16	2013-02-09	9.351	3.184	0.599333	0.648	36.7967	40.37
coarse	5	Straw mixed in	25	1	70	2013-01-16	2013-02-09	9.351	3.828	0.599333	0.544	36.7967	40.47
coarse	5	Straw mixed in	25	2	71	2013-01-16	2013-02-09	9.351	3.303	0.599333	0.675	36.7967	42.46
coarse	5	Straw mixed in	25	3	72	2013-01-16	2013-02-09	9.351	2.846	0.599333	0.677	36.7967	41.78
coarse	5	Control	25	1	73	2013-01-16	2013-02-09	9.351	2.938	0.599333	0.787	36.7967	42.16
coarse	5	Control	25	2	74	2013-01-16	2013-02-09	9.351	3.265	0.599333	0.767	36.7967	41.48
coarse	5	Control	25	3	75	2013-01-16	2013-02-09	9.351	2.968	0.599333	0.767	36.7967	41.82
coarse	1	Ash scattered	50	1	76	2013-01-16	2013-03-06	9.351	1.344	0.599333	1.125	36.7967	44.34
coarse	1	Ash scattered	50	2	77	2013-01-16	2013-03-06	9.351	0.964	0.599333	1.18	36.7967	43.2
coarse	1	Ash scattered	50	3	78	2013-01-16	2013-03-06	9.351	1.147	0.599333	1.343	36.7967	44.12
coarse	1	Ash mixed in	50	1	79	2013-01-16	2013-03-06	9.351	1.309	0.599333	1.143	36.7967	43.47
coarse	1	Ash mixed in	50	2	80	2013-01-16	2013-03-06	9.351	1.113	0.599333	1.187	36.7967	43.92
coarse	1	Ash mixed in	50	3	81	2013-01-16	2013-03-06	9.351	1.499	0.599333	1.07	36.7967	44.38
coarse	1	Straw scattered	50	1	82	2013-01-16	2013-03-06	9.351	1.629	0.599333	0.953	36.7967	43.7
coarse	1	Straw scattered	50	2	83	2013-01-16	2013-03-06	9.351	1.506	0.599333	1.124	36.7967	42.34
coarse	1	Straw scattered	50	3	84	2013-01-16	2013-03-06	9.351	1.762	0.599333	1.267	36.7967	42.27
coarse	1	Straw mixed in	50	1	85	2013-01-16	2013-03-06	9.351	1.321	0.599333	1.172	36.7967	43.12
coarse	1	Straw mixed in	50	2	86	2013-01-16	2013-03-06	9.351	1.282	0.599333	1.227	36.7967	42.74
coarse	1	Straw mixed in	50	3	87	2013-01-16	2013-03-06	9.351	1.526	0.599333	1.089	36.7967	43.33
coarse	1	Control	50	1	88	2013-01-16	2013-03-06	9.351	NA	0.599333	NA	36.7967	NA
coarse	1	Control	50	2	89	2013-01-16	2013-03-06	9.351	NA	0.599333	NA	36.7967	NA
coarse	1	Control	50	3	90	2013-01-16	2013-03-06	9.351	NA	0.599333	NA	36.7967	NA
coarse	2	Ash scattered	50	1	91	2013-01-16	2013-03-06	9.351	1.013	0.599333	1.385	36.7967	44.36
coarse	2	Ash scattered	50	2	92	2013-01-16	2013-03-06	9.351	0.861	0.599333	1.598	36.7967	43.96
coarse	2	Ash scattered	50	3	93	2013-01-16	2013-03-06	9.351	0.748	0.599333	1.453	36.7967	43.68
coarse	2	Ash mixed in	50	1	94	2013-01-16	2013-03-06	9.351	0.716	0.599333	1.433	36.7967	43.35
coarse	2	Ash mixed in	50	2	95	2013-01-16	2013-03-06	9.351	0.948	0.599333	1.479	36.7967	43.7
coarse	2	Ash mixed in	50	3	96	2013-01-16	2013-03-06	9.351	0.716	0.599333	1.657	36.7967	44.21
coarse	2	Straw scattered	50	1	97	2013-01-16	2013-03-06	9.351	1.2	0.599333	1.111	36.7967	43.18
coarse	2	Straw scattered	50	2	98	2013-01-16	2013-03-06	9.351	1.266	0.599333	1.131	36.7967	43.34
coarse	2	Straw scattered	50	3	99	2013-01-16	2013-03-06	9.351	1.147	0.599333	1.415	36.7967	44.16
coarse	2	Straw mixed in	50	1	100	2013-01-16	2013-03-06	9.351	1.321	0.599333	1.254	36.7967	40.65
coarse	2	Straw mixed in	50	2	101	2013-01-16	2013-03-06	9.351	0.845	0.599333	1.446	36.7967	43.63
coarse	2	Straw mixed in	50	3	102	2013-01-16	2013-03-06	9.351	0.992	0.599333	1.392	36.7967	43.19
coarse	2	Control	50	1	103	2013-01-16	2013-03-06	9.351	0.982	0.599333	1.479	36.7967	43.01
coarse	2	Control	50	2	104	2013-01-16	2013-03-06	9.351	0.73	0.599333	1.559	36.7967	43.54
coarse	2	Control	50	3	105	2013-01-16	2013-03-06	9.351	0.827	0.599333	1.539	36.7967	44.85
coarse	3	Ash scattered	50	1	106	2013-01-16	2013-03-06	9.351	0.759	0.599333	1.437	36.7967	43.35
coarse	3	Ash scattered	50	2	107	2013-01-16	2013-03-06	9.351	0.624	0.599333	1.429	36.7967	44.18
coarse	3	Ash scattered	50	3	108	2013-01-16	2013-03-06	9.351	0.955	0.599333	1.575	36.7967	43.83
coarse	3	Ash mixed in	50	1	109	2013-01-16	2013-03-06	9.351	0.748	0.599333	1.553	36.7967	43.13
coarse	3	Ash mixed in	50	2	110	2013-01-16	2013-03-06	9.351	0.737	0.599333	1.49	36.7967	43.87
coarse	3	Ash mixed in	50	3	111	2013-01-16	2013-03-06	9.351	0.909	0.599333	1.629	36.7967	43.27
coarse	3	Straw scattered	50	1	112	2013-01-16	2013-03-06	9.351	1.623	0.599333	1.194	36.7967	42.6
coarse	3	Straw scattered	50	2	113	2013-01-16	2013-03-06	9.351	1.26	0.599333	1.344	36.7967	42.45
coarse	3	Straw scattered	50	3	114	2013-01-16	2013-03-06	9.351	1.578	0.599333	1.087	36.7967	42.89
coarse	3	Straw mixed in	50	1	115	2013-01-16	2013-03-06	9.351	0.838	0.599333	1.3985	36.7967	45.265
coarse	3	Straw mixed in	50	2	116	2013-01-16	2013-03-06	9.351	0.701	0.599333	1.521	36.7967	43.14
coarse	3	Straw mixed in	50	3	117	2013-01-16	2013-03-06	9.351	0.775	0.599333	1.349	36.7967	41.99
coarse	3	Control	50	1	118	2013-01-16	2013-03-06	9.351	0.923	0.599333	1.279	36.7967	45.24
coarse	3	Control	50	2	119	2013-01-16	2013-03-06	9.351	1.055	0.599333	1.407	36.7967	44.45
coarse	3	Control	50	3	120	2013-01-16	2013-03-06	9.351	0.983	0.599333	1.353	36.7967	43.7
coarse	4	Ash scattered	50	1	121	2013-01-16	2013-03-06	9.351	0.831	0.599333	1.127	36.7967	44.9
coarse	4	Ash scattered	50	2	122	2013-01-16	2013-03-06	9.351	0.709	0.599333	1.439	36.7967	44.21
coarse	4	Ash scattered	50	3	123	2013-01-16	2013-03-06	9.351	0.911	0.599333	1.291	36.7967	43.98
coarse	4	Ash mixed in	50	1	124	2013-01-16	2013-03-06	9.351	0.577	0.599333	1.568	36.7967	44.49
coarse	4	Ash mixed in	50	2	125	2013-01-16	2013-03-06	9.351	1.115	0.599333	1.308	36.7967	45.18
coarse	4	Ash mixed in	50	3	126	2013-01-16	2013-03-06	9.351	0.605	0.599333	1.341	36.7967	45.08
coarse	4	Straw scattered	50	1	127	2013-01-16	2013-03-06	9.351	2.281	0.599333	1.133	36.7967	40.16
coarse	4	Straw scattered	50	2	128	2013-01-16	2013-03-06	9.351	1.524	0.599333	1.085	36.7967	41.75
coarse	4	Straw scattered	50	3	129	2013-01-16	2013-03-06	9.351	1.38	0.599333	1.1855	36.7967	43.915
coarse	4	Straw mixed in	50	1	130	2013-01-16	2013-03-06	9.351	1.036	0.599333	1.295	36.7967	44.74
coarse	4	Straw mixed in	50	2	131	2013-01-16	2013-03-06	9.351	1.64	0.599333	0.727	36.7967	44.81
coarse	4	Straw mixed in	50	3	132	2013-01-16	2013-03-06	9.351	1.449	0.599333	1.107	36.7967	44.09
coarse	4	Control	50	1	133	2013-01-16	2013-03-06	9.351	1.475	0.599333	0.881	36.7967	41.95
coarse	4	Control	50	2	134	2013-01-16	2013-03-06	9.351	1.536	0.599333	1.263	36.7967	43.5
coarse	4	Control	50	3	135	2013-01-16	2013-03-06	9.351	1.142	0.599333	1.043	36.7967	44.68
coarse	5	Ash scattered	50	1	136	2013-01-16	2013-03-06	9.351	0.874	0.599333	1.482	36.7967	44.4
coarse	5	Ash scattered	50	2	137	2013-01-16	2013-03-06	9.351	0.818	0.599333	1.451	36.7967	43.13
coarse	5	Ash scattered	50	3	138	2013-01-16	2013-03-06	9.351	0.993	0.599333	1.572	36.7967	43.4
coarse	5	Ash mixed in	50	1	139	2013-01-16	2013-03-06	9.351	0.802	0.599333	1.423	36.7967	44.55
coarse	5	Ash mixed in	50	2	140	2013-01-16	2013-03-06	9.351	0.977	0.599333	1.392	36.7967	42.83
coarse	5	Ash mixed in	50	3	141	2013-01-16	2013-03-06	9.351	1.039	0.599333	1.52	36.7967	42.42
coarse	5	Straw scattered	50	1	142	2013-01-16	2013-03-06	9.351	1.843	0.599333	1.225	36.7967	42.18
coarse	5	Straw scattered	50	2	143	2013-01-16	2013-03-06	9.351	1.658	0.599333	1.165	36.7967	42.89
coarse	5	Straw scattered	50	3	144	2013-01-16	2013-03-06	9.351	1.371	0.599333	1.058	36.7967	42.15
coarse	5	Straw mixed in	50	1	145	2013-01-16	2013-03-06	9.351	1.468	0.599333	1.092	36.7967	43.97
coarse	5	Straw mixed in	50	2	146	2013-01-16	2013-03-06	9.351	1.194	0.599333	1.049	36.7967	44.34
coarse	5	Straw mixed in	50	3	147	2013-01-16	2013-03-06	9.351	1.684	0.599333	1.114	36.7967	43.47
coarse	5	Control	50	1	148	2013-01-16	2013-03-06	9.351	1.612	0.599333	1.374	36.7967	44.76
coarse	5	Control	50	2	149	2013-01-16	2013-03-06	9.351	1.427	0.599333	1.321	36.7967	44.21
coarse	5	Control	50	3	150	2013-01-16	2013-03-06	9.351	1.432	0.599333	1.174	36.7967	44.59
coarse	1	Ash scattered	75	1	151	2013-01-16	2013-03-31	9.351	0.562	0.599333	1.401	36.7967	44.96
coarse	1	Ash scattered	75	2	152	2013-01-16	2013-03-31	9.351	0.679	0.599333	1.61	36.7967	44.7
coarse	1	Ash scattered	75	3	153	2013-01-16	2013-03-31	9.351	0.641	0.599333	1.41	36.7967	46.1
coarse	1	Ash mixed in	75	1	154	2013-01-16	2013-03-31	9.351	0.623	0.599333	1.491	36.7967	45.35
coarse	1	Ash mixed in	75	2	155	2013-01-16	2013-03-31	9.351	0.431	0.599333	1.489	36.7967	45.12
coarse	1	Ash mixed in	75	3	156	2013-01-16	2013-03-31	9.351	0.633	0.599333	1.444	36.7967	45.94
coarse	1	Straw scattered	75	1	157	2013-01-16	2013-03-31	9.351	0.522	0.599333	1.477	36.7967	44.7
coarse	1	Straw scattered	75	2	158	2013-01-16	2013-03-31	9.351	0.802	0.599333	1.297	36.7967	44.89
coarse	1	Straw scattered	75	3	159	2013-01-16	2013-03-31	9.351	0.665	0.599333	1.298	36.7967	43.94
coarse	1	Straw mixed in	75	1	160	2013-01-16	2013-03-31	9.351	0.796	0.599333	1.866	36.7967	44.01
coarse	1	Straw mixed in	75	2	161	2013-01-16	2013-03-31	9.351	0.666	0.599333	1.164	36.7967	45.71
coarse	1	Straw mixed in	75	3	162	2013-01-16	2013-03-31	9.351	0.492	0.599333	1.256	36.7967	43.87
coarse	1	Control	75	1	163	2013-01-16	2013-03-31	9.351	0.459	0.599333	1.421	36.7967	46.25
coarse	1	Control	75	2	164	2013-01-16	2013-03-31	9.351	0.445	0.599333	1.415	36.7967	46.23
coarse	1	Control	75	3	165	2013-01-16	2013-03-31	9.351	0.471	0.599333	1.366	36.7967	45.89
coarse	2	Ash scattered	75	1	166	2013-01-16	2013-03-31	9.351	0.425	0.599333	1.714	36.7967	46.17
coarse	2	Ash scattered	75	2	167	2013-01-16	2013-03-31	9.351	0.375	0.599333	1.531	36.7967	43.99
coarse	2	Ash scattered	75	3	168	2013-01-16	2013-03-31	9.351	0.247	0.599333	1.507	36.7967	45.26
coarse	2	Ash mixed in	75	1	169	2013-01-16	2013-03-31	9.351	0.344	0.599333	1.535	36.7967	45.93
coarse	2	Ash mixed in	75	2	170	2013-01-16	2013-03-31	9.351	0.4	0.599333	1.539	36.7967	45.9
coarse	2	Ash mixed in	75	3	171	2013-01-16	2013-03-31	9.351	0.297	0.599333	1.509	36.7967	46.21
coarse	2	Straw scattered	75	1	172	2013-01-16	2013-03-31	9.351	0.669	0.599333	1.115	36.7967	44.63
coarse	2	Straw scattered	75	2	173	2013-01-16	2013-03-31	9.351	0.62	0.599333	1.32	36.7967	45.46
coarse	2	Straw scattered	75	3	174	2013-01-16	2013-03-31	9.351	0.457	0.599333	1.329	36.7967	44.54
coarse	2	Straw mixed in	75	1	175	2013-01-16	2013-03-31	9.351	0.455	0.599333	1.565	36.7967	45.13
coarse	2	Straw mixed in	75	2	176	2013-01-16	2013-03-31	9.351	0.393	0.599333	1.42	36.7967	45.34
coarse	2	Straw mixed in	75	3	177	2013-01-16	2013-03-31	9.351	0.469	0.599333	1.556	36.7967	45.41
coarse	2	Control	75	1	178	2013-01-16	2013-03-31	9.351	0.291	0.599333	1.548	36.7967	45.99
coarse	2	Control	75	2	179	2013-01-16	2013-03-31	9.351	0.561	0.599333	1.172	36.7967	45.31
coarse	2	Control	75	3	180	2013-01-16	2013-03-31	9.351	0.644	0.599333	1.298	36.7967	45.91
coarse	3	Ash scattered	75	1	181	2013-01-16	2013-03-31	9.351	NA	0.599333	NA	36.7967	NA
coarse	3	Ash scattered	75	2	182	2013-01-16	2013-03-31	9.351	0.759	0.599333	1.63	36.7967	44.6
coarse	3	Ash scattered	75	3	183	2013-01-16	2013-03-31	9.351	0.429	0.599333	1.73	36.7967	44.36
coarse	3	Ash mixed in	75	1	184	2013-01-16	2013-03-31	9.351	0.425	0.599333	1.558	36.7967	45.43
coarse	3	Ash mixed in	75	2	185	2013-01-16	2013-03-31	9.351	0.3	0.599333	1.642	36.7967	43.44
coarse	3	Ash mixed in	75	3	186	2013-01-16	2013-03-31	9.351	0.335	0.599333	1.503	36.7967	45.09
coarse	3	Straw scattered	75	1	187	2013-01-16	2013-03-31	9.351	0.686	0.599333	1.399	36.7967	46.13
coarse	3	Straw scattered	75	2	188	2013-01-16	2013-03-31	9.351	0.682	0.599333	1.328	36.7967	45.24
coarse	3	Straw scattered	75	3	189	2013-01-16	2013-03-31	9.351	0.619	0.599333	1.221	36.7967	44.64
coarse	3	Straw mixed in	75	1	190	2013-01-16	2013-03-31	9.351	0.393	0.599333	1.62	36.7967	44.35
coarse	3	Straw mixed in	75	2	191	2013-01-16	2013-03-31	9.351	0.366	0.599333	1.725	36.7967	43.88
coarse	3	Straw mixed in	75	3	192	2013-01-16	2013-03-31	9.351	0.438	0.599333	1.701	36.7967	43.66
coarse	3	Control	75	1	193	2013-01-16	2013-03-31	9.351	0.367	0.599333	1.412	36.7967	44.98
coarse	3	Control	75	2	194	2013-01-16	2013-03-31	9.351	0.482	0.599333	1.397	36.7967	45.41
coarse	3	Control	75	3	195	2013-01-16	2013-03-31	9.351	0.333	0.599333	1.338	36.7967	45.37
coarse	4	Ash scattered	75	1	196	2013-01-16	2013-03-31	9.351	0.367	0.599333	1.647	36.7967	44.66
coarse	4	Ash scattered	75	2	197	2013-01-16	2013-03-31	9.351	0.36	0.599333	1.578	36.7967	43.76
coarse	4	Ash scattered	75	3	198	2013-01-16	2013-03-31	9.351	0.355	0.599333	1.584	36.7967	43.8
coarse	4	Ash mixed in	75	1	199	2013-01-16	2013-03-31	9.351	0.442	0.599333	1.735	36.7967	45.49
coarse	4	Ash mixed in	75	2	200	2013-01-16	2013-03-31	9.351	0.415	0.599333	1.73	36.7967	43.87
coarse	4	Ash mixed in	75	3	201	2013-01-16	2013-03-31	9.351	0.529	0.599333	1.657	36.7967	45.57
coarse	4	Straw scattered	75	1	202	2013-01-16	2013-03-31	9.351	0.558	0.599333	1.118	36.7967	43.81
coarse	4	Straw scattered	75	2	203	2013-01-16	2013-03-31	9.351	0.561	0.599333	1.457	36.7967	44.84
coarse	4	Straw scattered	75	3	204	2013-01-16	2013-03-31	9.351	0.626	0.599333	1.188	36.7967	43.63
coarse	4	Straw mixed in	75	1	205	2013-01-16	2013-03-31	9.351	0.725	0.599333	1.5	36.7967	44.73
coarse	4	Straw mixed in	75	2	206	2013-01-16	2013-03-31	9.351	0.405	0.599333	1.614	36.7967	44.44
coarse	4	Straw mixed in	75	3	207	2013-01-16	2013-03-31	9.351	0.488	0.599333	1.444	36.7967	45.57
coarse	4	Control	75	1	208	2013-01-16	2013-03-31	9.351	0.672	0.599333	1.421	36.7967	45.52
coarse	4	Control	75	2	209	2013-01-16	2013-03-31	9.351	0.545	0.599333	1.373	36.7967	45.51
coarse	4	Control	75	3	210	2013-01-16	2013-03-31	9.351	0.594	0.599333	1.446	36.7967	45.96
coarse	5	Ash scattered	75	1	211	2013-01-16	2013-03-31	9.351	0.397	0.599333	1.678	36.7967	45.11
coarse	5	Ash scattered	75	2	212	2013-01-16	2013-03-31	9.351	0.423	0.599333	1.721	36.7967	45.13
coarse	5	Ash scattered	75	3	213	2013-01-16	2013-03-31	9.351	0.375	0.599333	1.699	36.7967	46.12
coarse	5	Ash mixed in	75	1	214	2013-01-16	2013-03-31	9.351	0.426	0.599333	1.725	36.7967	44.45
coarse	5	Ash mixed in	75	2	215	2013-01-16	2013-03-31	9.351	0.423	0.599333	1.599	36.7967	45.61
coarse	5	Ash mixed in	75	3	216	2013-01-16	2013-03-31	9.351	0.468	0.599333	1.815	36.7967	44.84
coarse	5	Straw scattered	75	1	217	2013-01-16	2013-03-31	9.351	0.438	0.599333	1.231	36.7967	44.8
coarse	5	Straw scattered	75	2	218	2013-01-16	2013-03-31	9.351	0.529	0.599333	1.414	36.7967	45.41
coarse	5	Straw scattered	75	3	219	2013-01-16	2013-03-31	9.351	0.473	0.599333	1.355	36.7967	45.56
coarse	5	Straw mixed in	75	1	220	2013-01-16	2013-03-31	9.351	0.591	0.599333	1.373	36.7967	45.63
coarse	5	Straw mixed in	75	2	221	2013-01-16	2013-03-31	9.351	0.685	0.599333	1.122	36.7967	45.74
coarse	5	Straw mixed in	75	3	222	2013-01-16	2013-03-31	9.351	0.72	0.599333	1.539	36.7967	45.26
coarse	5	Control	75	1	223	2013-01-16	2013-03-31	9.351	0.596	0.599333	1.09	36.7967	45.59
coarse	5	Control	75	2	224	2013-01-16	2013-03-31	9.351	0.742	0.599333	1.318	36.7967	46.15
coarse	5	Control	75	3	225	2013-01-16	2013-03-31	9.351	0.463	0.599333	1.42	36.7967	45.59
fine	1	Ash scattered	25	1	1	2013-01-16	2013-02-09	9.351	5.345	0.599333	0.683	36.7967	42.57
fine	1	Ash scattered	25	2	2	2013-01-16	2013-02-09	9.351	4.578	0.599333	0.837	36.7967	40.16
fine	1	Ash scattered	25	3	3	2013-01-16	2013-02-09	9.351	5.212	0.599333	0.635	36.7967	42.18
fine	1	Ash mixed in	25	1	4	2013-01-16	2013-02-09	9.351	5.058	0.599333	0.591	36.7967	37.61
fine	1	Ash mixed in	25	2	5	2013-01-16	2013-02-09	9.351	4.463	0.599333	0.718	36.7967	42.14
fine	1	Ash mixed in	25	3	6	2013-01-16	2013-02-09	9.351	5.112	0.599333	0.771	36.7967	40.36
fine	1	Straw scattered	25	1	7	2013-01-16	2013-02-09	9.351	6.609	0.599333	0.822	36.7967	37.25
fine	1	Straw scattered	25	2	8	2013-01-16	2013-02-09	9.351	4.174	0.599333	0.8	36.7967	41.99
fine	1	Straw scattered	25	3	9	2013-01-16	2013-02-09	9.351	4.667	0.599333	0.856	36.7967	38.29
fine	1	Straw mixed in	25	1	10	2013-01-16	2013-02-09	9.351	4.496	0.599333	0.758	36.7967	40.43
fine	1	Straw mixed in	25	2	11	2013-01-16	2013-02-09	9.351	4.365	0.599333	0.655	36.7967	40.39
fine	1	Straw mixed in	25	3	12	2013-01-16	2013-02-09	9.351	3.618	0.599333	0.732	36.7967	42.03
fine	1	Control	25	1	13	2013-01-16	2013-02-09	9.351	4.454	0.599333	0.677	36.7967	41.11
fine	1	Control	25	2	14	2013-01-16	2013-02-09	9.351	3.809	0.599333	0.84	36.7967	41.31
fine	1	Control	25	3	15	2013-01-16	2013-02-09	9.351	4.428	0.599333	0.749	36.7967	43.47
fine	2	Ash scattered	25	1	16	2013-01-16	2013-02-09	9.351	4.034	0.599333	0.548	36.7967	39.59
fine	2	Ash scattered	25	2	17	2013-01-16	2013-02-09	9.351	3.938	0.599333	0.608	36.7967	41.37
fine	2	Ash scattered	25	3	18	2013-01-16	2013-02-09	9.351	4.349	0.599333	0.528	36.7967	39.13
fine	2	Ash mixed in	25	1	19	2013-01-16	2013-02-09	9.351	4.599	0.599333	0.542	36.7967	41.32
fine	2	Ash mixed in	25	2	20	2013-01-16	2013-02-09	9.351	3.694	0.599333	0.732	36.7967	40.15
fine	2	Ash mixed in	25	3	21	2013-01-16	2013-02-09	9.351	4.297	0.599333	0.781	36.7967	42.25
fine	2	Straw scattered	25	1	22	2013-01-16	2013-02-09	9.351	4.128	0.599333	0.703	36.7967	38.48
fine	2	Straw scattered	25	2	23	2013-01-16	2013-02-09	9.351	5.585	0.599333	0.55	36.7967	39.56
fine	2	Straw scattered	25	3	24	2013-01-16	2013-02-09	9.351	4.518	0.599333	0.678	36.7967	39.77
fine	2	Straw mixed in	25	1	25	2013-01-16	2013-02-09	9.351	3.417	0.599333	0.7	36.7967	41.5
fine	2	Straw mixed in	25	2	26	2013-01-16	2013-02-09	9.351	4.919	0.599333	0.584	36.7967	39.95
fine	2	Straw mixed in	25	3	27	2013-01-16	2013-02-09	9.351	3.624	0.599333	0.733	36.7967	41.24
fine	2	Control	25	1	28	2013-01-16	2013-02-09	9.351	3.888	0.599333	0.81	36.7967	41.29
fine	2	Control	25	2	29	2013-01-16	2013-02-09	9.351	3.771	0.599333	0.683	36.7967	42.79
fine	2	Control	25	3	30	2013-01-16	2013-02-09	9.351	3.577	0.599333	0.797	36.7967	41.18
fine	3	Ash scattered	25	1	31	2013-01-16	2013-02-09	9.351	3.995	0.599333	0.89	36.7967	41.77
fine	3	Ash scattered	25	2	32	2013-01-16	2013-02-09	9.351	3.971	0.599333	0.689	36.7967	40.46
fine	3	Ash scattered	25	3	33	2013-01-16	2013-02-09	9.351	3.75	0.599333	0.805	36.7967	40.78
fine	3	Ash mixed in	25	1	34	2013-01-16	2013-02-09	9.351	3.365	0.599333	0.676	36.7967	42.25
fine	3	Ash mixed in	25	2	35	2013-01-16	2013-02-09	9.351	3.956	0.599333	0.703	36.7967	41.61
fine	3	Ash mixed in	25	3	36	2013-01-16	2013-02-09	9.351	4.032	0.599333	0.585	36.7967	40.8
fine	3	Straw scattered	25	1	37	2013-01-16	2013-02-09	9.351	5.459	0.599333	0.61	36.7967	38.22
fine	3	Straw scattered	25	2	38	2013-01-16	2013-02-09	9.351	4.966	0.599333	0.63	36.7967	39.19
fine	3	Straw scattered	25	3	39	2013-01-16	2013-02-09	9.351	4.966	0.599333	0.723	36.7967	40.01
fine	3	Straw mixed in	25	1	40	2013-01-16	2013-02-09	9.351	3.181	0.599333	0.788	36.7967	41.9
fine	3	Straw mixed in	25	2	41	2013-01-16	2013-02-09	9.351	2.557	0.599333	0.855	36.7967	42.35
fine	3	Straw mixed in	25	3	42	2013-01-16	2013-02-09	9.351	4.191	0.599333	0.948	36.7967	38.59
fine	3	Control	25	1	43	2013-01-16	2013-02-09	9.351	4.272	0.599333	0.689	36.7967	42.49
fine	3	Control	25	2	44	2013-01-16	2013-02-09	9.351	2.702	0.599333	0.856	36.7967	43.43
fine	3	Control	25	3	45	2013-01-16	2013-02-09	9.351	4.298	0.599333	0.777	36.7967	42.3
fine	4	Ash scattered	25	1	46	2013-01-16	2013-02-09	9.351	4.088	0.599333	0.876	36.7967	40.38
fine	4	Ash scattered	25	2	47	2013-01-16	2013-02-09	9.351	4.945	0.599333	0.765	36.7967	42.55
fine	4	Ash scattered	25	3	48	2013-01-16	2013-02-09	9.351	3.883	0.599333	0.97	36.7967	43.05
fine	4	Ash mixed in	25	1	49	2013-01-16	2013-02-09	9.351	2.936	0.599333	0.865	36.7967	41.81
fine	4	Ash mixed in	25	2	50	2013-01-16	2013-02-09	9.351	3.855	0.599333	0.754	36.7967	43.72
fine	4	Ash mixed in	25	3	51	2013-01-16	2013-02-09	9.351	3.1	0.599333	0.788	36.7967	41.59
fine	4	Straw scattered	25	1	52	2013-01-16	2013-02-09	9.351	4.237	0.599333	0.806	36.7967	39.08
fine	4	Straw scattered	25	2	53	2013-01-16	2013-02-09	9.351	3.749	0.599333	0.904	36.7967	39.2
fine	4	Straw scattered	25	3	54	2013-01-16	2013-02-09	9.351	5.148	0.599333	0.765	36.7967	38.41
fine	4	Straw mixed in	25	1	55	2013-01-16	2013-02-09	9.351	3.554	0.599333	0.75	36.7967	43
fine	4	Straw mixed in	25	2	56	2013-01-16	2013-02-09	9.351	4.307	0.599333	0.786	36.7967	41.4
fine	4	Straw mixed in	25	3	57	2013-01-16	2013-02-09	9.351	4.239	0.599333	0.732	36.7967	41.5
fine	4	Control	25	1	58	2013-01-16	2013-02-09	9.351	4.231	0.599333	0.579	36.7967	41.51
fine	4	Control	25	2	59	2013-01-16	2013-02-09	9.351	3.739	0.599333	0.666	36.7967	42.12
fine	4	Control	25	3	60	2013-01-16	2013-02-09	9.351	4.753	0.599333	0.482	36.7967	38.39
fine	5	Ash scattered	25	1	61	2013-01-16	2013-02-09	9.351	3.882	0.599333	0.553	36.7967	42.61
fine	5	Ash scattered	25	2	62	2013-01-16	2013-02-09	9.351	2.846	0.599333	0.759	36.7967	42.82
fine	5	Ash scattered	25	3	63	2013-01-16	2013-02-09	9.351	3.759	0.599333	0.579	36.7967	41.55
fine	5	Ash mixed in	25	1	64	2013-01-16	2013-02-09	9.351	4.306	0.599333	0.735	36.7967	42.04
fine	5	Ash mixed in	25	2	65	2013-01-16	2013-02-09	9.351	3.466	0.599333	0.708	36.7967	43.41
fine	5	Ash mixed in	25	3	66	2013-01-16	2013-02-09	9.351	4.829	0.599333	0.7485	36.7967	42.26
fine	5	Straw scattered	25	1	67	2013-01-16	2013-02-09	9.351	4.369	0.599333	0.67	36.7967	38.28
fine	5	Straw scattered	25	2	68	2013-01-16	2013-02-09	9.351	4.222	0.599333	0.714	36.7967	38.59
fine	5	Straw scattered	25	3	69	2013-01-16	2013-02-09	9.351	4.134	0.599333	0.696	36.7967	40.38
fine	5	Straw mixed in	25	1	70	2013-01-16	2013-02-09	9.351	5.195	0.599333	0.702	36.7967	41.95
fine	5	Straw mixed in	25	2	71	2013-01-16	2013-02-09	9.351	4.819	0.599333	0.878	36.7967	40.69
fine	5	Straw mixed in	25	3	72	2013-01-16	2013-02-09	9.351	4.569	0.599333	0.66	36.7967	41.76
fine	5	Control	25	1	73	2013-01-16	2013-02-09	9.351	3.501	0.599333	0.883	36.7967	44.07
fine	5	Control	25	2	74	2013-01-16	2013-02-09	9.351	4.342	0.599333	1.039	36.7967	42.85
fine	5	Control	25	3	75	2013-01-16	2013-02-09	9.351	2.415	0.599333	0.898	36.7967	42.55
fine	1	Ash scattered	50	1	76	2013-01-16	2013-03-06	9.351	2.029	0.599333	1.001	36.7967	44.13
fine	1	Ash scattered	50	2	77	2013-01-16	2013-03-06	9.351	2.139	0.599333	0.765	36.7967	44.84
fine	1	Ash scattered	50	3	78	2013-01-16	2013-03-06	9.351	1.94	0.599333	0.831	36.7967	44.97
fine	1	Ash mixed in	50	1	79	2013-01-16	2013-03-06	9.351	1.868	0.599333	0.9	36.7967	43.5
fine	1	Ash mixed in	50	2	80	2013-01-16	2013-03-06	9.351	1.834	0.599333	0.871	36.7967	45.69
fine	1	Ash mixed in	50	3	81	2013-01-16	2013-03-06	9.351	3.11	0.599333	0.691	36.7967	43.8
fine	1	Straw scattered	50	1	82	2013-01-16	2013-03-06	9.351	1.793	0.599333	1.206	36.7967	43.34
fine	1	Straw scattered	50	2	83	2013-01-16	2013-03-06	9.351	2.092	0.599333	0.819	36.7967	42.79
fine	1	Straw scattered	50	3	84	2013-01-16	2013-03-06	9.351	1.775	0.599333	0.916	36.7967	42.07
fine	1	Straw mixed in	50	1	85	2013-01-16	2013-03-06	9.351	2.32	0.599333	0.664	36.7967	44.65
fine	1	Straw mixed in	50	2	86	2013-01-16	2013-03-06	9.351	2.562	0.599333	0.681	36.7967	41.83
fine	1	Straw mixed in	50	3	87	2013-01-16	2013-03-06	9.351	2.586	0.599333	0.65	36.7967	43.51
fine	1	Control	50	1	88	2013-01-16	2013-03-06	9.351	NA	0.599333	NA	36.7967	NA
fine	1	Control	50	2	89	2013-01-16	2013-03-06	9.351	NA	0.599333	NA	36.7967	NA
fine	1	Control	50	3	90	2013-01-16	2013-03-06	9.351	NA	0.599333	NA	36.7967	NA
fine	2	Ash scattered	50	1	91	2013-01-16	2013-03-06	9.351	1.339	0.599333	1.09	36.7967	44.07
fine	2	Ash scattered	50	2	92	2013-01-16	2013-03-06	9.351	2.707	0.599333	0.798	36.7967	42.54
fine	2	Ash scattered	50	3	93	2013-01-16	2013-03-06	9.351	2.089	0.599333	1.614	36.7967	42.71
fine	2	Ash mixed in	50	1	94	2013-01-16	2013-03-06	9.351	1.385	0.599333	1.051	36.7967	45.32
fine	2	Ash mixed in	50	2	95	2013-01-16	2013-03-06	9.351	1.945	0.599333	0.812	36.7967	43.77
fine	2	Ash mixed in	50	3	96	2013-01-16	2013-03-06	9.351	1.507	0.599333	0.795	36.7967	44.72
fine	2	Straw scattered	50	1	97	2013-01-16	2013-03-06	9.351	2.628	0.599333	0.6	36.7967	42.96
fine	2	Straw scattered	50	2	98	2013-01-16	2013-03-06	9.351	2.08	0.599333	0.874	36.7967	43.34
fine	2	Straw scattered	50	3	99	2013-01-16	2013-03-06	9.351	1.67	0.599333	0.866	36.7967	43.43
fine	2	Straw mixed in	50	1	100	2013-01-16	2013-03-06	9.351	2.062	0.599333	0.81	36.7967	41.39
fine	2	Straw mixed in	50	2	101	2013-01-16	2013-03-06	9.351	2.542	0.599333	0.747	36.7967	43.4
fine	2	Straw mixed in	50	3	102	2013-01-16	2013-03-06	9.351	1.842	0.599333	0.922	36.7967	43.83
fine	2	Control	50	1	103	2013-01-16	2013-03-06	9.351	1.239	0.599333	1.131	36.7967	43.21
fine	2	Control	50	2	104	2013-01-16	2013-03-06	9.351	1.846	0.599333	0.77	36.7967	44.42
fine	2	Control	50	3	105	2013-01-16	2013-03-06	9.351	2.322	0.599333	0.717	36.7967	43.84
fine	3	Ash scattered	50	1	106	2013-01-16	2013-03-06	9.351	2.132	0.599333	0.93	36.7967	44.53
fine	3	Ash scattered	50	2	107	2013-01-16	2013-03-06	9.351	1.527	0.599333	1.022	36.7967	44.24
fine	3	Ash scattered	50	3	108	2013-01-16	2013-03-06	9.351	2.255	0.599333	0.745	36.7967	43.69
fine	3	Ash mixed in	50	1	109	2013-01-16	2013-03-06	9.351	2.002	0.599333	0.816	36.7967	41.91
fine	3	Ash mixed in	50	2	110	2013-01-16	2013-03-06	9.351	1.545	0.599333	0.932	36.7967	44.16
fine	3	Ash mixed in	50	3	111	2013-01-16	2013-03-06	9.351	1.363	0.599333	1	36.7967	44.2
fine	3	Straw scattered	50	1	112	2013-01-16	2013-03-06	9.351	2.173	0.599333	0.685	36.7967	42.76
fine	3	Straw scattered	50	2	113	2013-01-16	2013-03-06	9.351	1.969	0.599333	0.82	36.7967	42.9
fine	3	Straw scattered	50	3	114	2013-01-16	2013-03-06	9.351	1.811	0.599333	0.935	36.7967	41.84
fine	3	Straw mixed in	50	1	115	2013-01-16	2013-03-06	9.351	1.188	0.599333	1.229	36.7967	44.31
fine	3	Straw mixed in	50	2	116	2013-01-16	2013-03-06	9.351	1.145	0.599333	1.331	36.7967	43.86
fine	3	Straw mixed in	50	3	117	2013-01-16	2013-03-06	9.351	1.351	0.599333	1.308	36.7967	44.07
fine	3	Control	50	1	118	2013-01-16	2013-03-06	9.351	1.964	0.599333	0.615	36.7967	44.97
fine	3	Control	50	2	119	2013-01-16	2013-03-06	9.351	1.247	0.599333	1.188	36.7967	44.66
fine	3	Control	50	3	120	2013-01-16	2013-03-06	9.351	1.324	0.599333	1.117	36.7967	44.01
fine	4	Ash scattered	50	1	121	2013-01-16	2013-03-06	9.351	1.386	0.599333	0.899	36.7967	44.3
fine	4	Ash scattered	50	2	122	2013-01-16	2013-03-06	9.351	1.282	0.599333	1.099	36.7967	44.51
fine	4	Ash scattered	50	3	123	2013-01-16	2013-03-06	9.351	1.654	0.599333	0.987	36.7967	44.76
fine	4	Ash mixed in	50	1	124	2013-01-16	2013-03-06	9.351	1.7	0.599333	0.948	36.7967	44.22
fine	4	Ash mixed in	50	2	125	2013-01-16	2013-03-06	9.351	1.863	0.599333	0.859	36.7967	43.11
fine	4	Ash mixed in	50	3	126	2013-01-16	2013-03-06	9.351	1.749	0.599333	1.123	36.7967	44.32
fine	4	Straw scattered	50	1	127	2013-01-16	2013-03-06	9.351	1.76	0.599333	0.951	36.7967	43.11
fine	4	Straw scattered	50	2	128	2013-01-16	2013-03-06	9.351	1.463	0.599333	1.263	36.7967	43.68
fine	4	Straw scattered	50	3	129	2013-01-16	2013-03-06	9.351	1.56	0.599333	0.867	36.7967	43.22
fine	4	Straw mixed in	50	1	130	2013-01-16	2013-03-06	9.351	2.382	0.599333	0.849	36.7967	42.64
fine	4	Straw mixed in	50	2	131	2013-01-16	2013-03-06	9.351	1.966	0.599333	0.707	36.7967	43.96
fine	4	Straw mixed in	50	3	132	2013-01-16	2013-03-06	9.351	1.439	0.599333	1.058	36.7967	44.77
fine	4	Control	50	1	133	2013-01-16	2013-03-06	9.351	1.942	0.599333	0.816	36.7967	44.51
fine	4	Control	50	2	134	2013-01-16	2013-03-06	9.351	2.594	0.599333	0.832	36.7967	41.71
fine	4	Control	50	3	135	2013-01-16	2013-03-06	9.351	1.306	0.599333	1.093	36.7967	45.33
fine	5	Ash scattered	50	1	136	2013-01-16	2013-03-06	9.351	1.636	0.599333	1.221	36.7967	45.82
fine	5	Ash scattered	50	2	137	2013-01-16	2013-03-06	9.351	2.36	0.599333	0.69	36.7967	44.86
fine	5	Ash scattered	50	3	138	2013-01-16	2013-03-06	9.351	1.831	0.599333	1.16	36.7967	45.35
fine	5	Ash mixed in	50	1	139	2013-01-16	2013-03-06	9.351	1.607	0.599333	0.961	36.7967	44.51
fine	5	Ash mixed in	50	2	140	2013-01-16	2013-03-06	9.351	1.723	0.599333	1.112	36.7967	44.67
fine	5	Ash mixed in	50	3	141	2013-01-16	2013-03-06	9.351	1.558	0.599333	0.835	36.7967	44.38
fine	5	Straw scattered	50	1	142	2013-01-16	2013-03-06	9.351	1.266	0.599333	1.298	36.7967	45.33
fine	5	Straw scattered	50	2	143	2013-01-16	2013-03-06	9.351	1.661	0.599333	0.907	36.7967	43.99
fine	5	Straw scattered	50	3	144	2013-01-16	2013-03-06	9.351	1.831	0.599333	1.004	36.7967	44
fine	5	Straw mixed in	50	1	145	2013-01-16	2013-03-06	9.351	1.392	0.599333	0.973	36.7967	45.5
fine	5	Straw mixed in	50	2	146	2013-01-16	2013-03-06	9.351	2.101	0.599333	0.975	36.7967	44.75
fine	5	Straw mixed in	50	3	147	2013-01-16	2013-03-06	9.351	1.594	0.599333	0.888	36.7967	44.92
fine	5	Control	50	1	148	2013-01-16	2013-03-06	9.351	1.794	0.599333	0.897	36.7967	45.07
fine	5	Control	50	2	149	2013-01-16	2013-03-06	9.351	2.644	0.599333	0.836	36.7967	43.87
fine	5	Control	50	3	150	2013-01-16	2013-03-06	9.351	1.796	0.599333	0.805	36.7967	44.96
fine	1	Ash scattered	75	1	151	2013-01-16	2013-03-31	9.351	1.326	0.599333	0.891	36.7967	45.13
fine	1	Ash scattered	75	2	152	2013-01-16	2013-03-31	9.351	1.318	0.599333	1.351	36.7967	45.94
fine	1	Ash scattered	75	3	153	2013-01-16	2013-03-31	9.351	1.186	0.599333	1.486	36.7967	46.46
fine	1	Ash mixed in	75	1	154	2013-01-16	2013-03-31	9.351	1.065	0.599333	1.2475	36.7967	46.435
fine	1	Ash mixed in	75	2	155	2013-01-16	2013-03-31	9.351	1.209	0.599333	1.12	36.7967	46.29
fine	1	Ash mixed in	75	3	156	2013-01-16	2013-03-31	9.351	1.336	0.599333	1.04	36.7967	45.39
fine	1	Straw scattered	75	1	157	2013-01-16	2013-03-31	9.351	1.094	0.599333	1.554	36.7967	45.24
fine	1	Straw scattered	75	2	158	2013-01-16	2013-03-31	9.351	0.21	0.599333	1.367	36.7967	44.32
fine	1	Straw scattered	75	3	159	2013-01-16	2013-03-31	9.351	1.377	0.599333	1.256	36.7967	45.61
fine	1	Straw mixed in	75	1	160	2013-01-16	2013-03-31	9.351	1.414	0.599333	0.948	36.7967	45.74
fine	1	Straw mixed in	75	2	161	2013-01-16	2013-03-31	9.351	1.429	0.599333	0.975	36.7967	46.45
fine	1	Straw mixed in	75	3	162	2013-01-16	2013-03-31	9.351	1.182	0.599333	1.135	36.7967	45.15
fine	1	Control	75	1	163	2013-01-16	2013-03-31	9.351	1.434	0.599333	1.062	36.7967	45.75
fine	1	Control	75	2	164	2013-01-16	2013-03-31	9.351	1.478	0.599333	0.951	36.7967	45.93
fine	1	Control	75	3	165	2013-01-16	2013-03-31	9.351	1.18	0.599333	1.333	36.7967	46.22
fine	2	Ash scattered	75	1	166	2013-01-16	2013-03-31	9.351	0.903	0.599333	1.208	36.7967	46.63
fine	2	Ash scattered	75	2	167	2013-01-16	2013-03-31	9.351	0.744	0.599333	1.541	36.7967	46.19
fine	2	Ash scattered	75	3	168	2013-01-16	2013-03-31	9.351	0.982	0.599333	1.226	36.7967	46.09
fine	2	Ash mixed in	75	1	169	2013-01-16	2013-03-31	9.351	0.899	0.599333	1.32	36.7967	46.18
fine	2	Ash mixed in	75	2	170	2013-01-16	2013-03-31	9.351	0.3	0.599333	1.348	36.7967	46.71
fine	2	Ash mixed in	75	3	171	2013-01-16	2013-03-31	9.351	0.875	0.599333	1.265	36.7967	46.46
fine	2	Straw scattered	75	1	172	2013-01-16	2013-03-31	9.351	1.04	0.599333	1.192	36.7967	43.63
fine	2	Straw scattered	75	2	173	2013-01-16	2013-03-31	9.351	1.185	0.599333	0.954	36.7967	45.72
fine	2	Straw scattered	75	3	174	2013-01-16	2013-03-31	9.351	1.06	0.599333	1.21	36.7967	44.35
fine	2	Straw mixed in	75	1	175	2013-01-16	2013-03-31	9.351	0.938	0.599333	1.427	36.7967	44.48
fine	2	Straw mixed in	75	2	176	2013-01-16	2013-03-31	9.351	0.74	0.599333	1.46	36.7967	45.93
fine	2	Straw mixed in	75	3	177	2013-01-16	2013-03-31	9.351	0.817	0.599333	1.387	36.7967	45.64
fine	2	Control	75	1	178	2013-01-16	2013-03-31	9.351	0.715	0.599333	1.306	36.7967	45.92
fine	2	Control	75	2	179	2013-01-16	2013-03-31	9.351	1.496	0.599333	1.115	36.7967	43.2
fine	2	Control	75	3	180	2013-01-16	2013-03-31	9.351	1.048	0.599333	1.444	36.7967	43.86
fine	3	Ash scattered	75	1	181	2013-01-16	2013-03-31	9.351	0.981	0.599333	1.357	36.7967	45.26
fine	3	Ash scattered	75	2	182	2013-01-16	2013-03-31	9.351	0.86	0.599333	1.327	36.7967	45.22
fine	3	Ash scattered	75	3	183	2013-01-16	2013-03-31	9.351	1.009	0.599333	1.335	36.7967	45.87
fine	3	Ash mixed in	75	1	184	2013-01-16	2013-03-31	9.351	0.726	0.599333	1.298	36.7967	46.02
fine	3	Ash mixed in	75	2	185	2013-01-16	2013-03-31	9.351	1.195	0.599333	1.003	36.7967	46.13
fine	3	Ash mixed in	75	3	186	2013-01-16	2013-03-31	9.351	0.694	0.599333	1.306	36.7967	45.81
fine	3	Straw scattered	75	1	187	2013-01-16	2013-03-31	9.351	0.815	0.599333	1.212	36.7967	44.77
fine	3	Straw scattered	75	2	188	2013-01-16	2013-03-31	9.351	1.062	0.599333	1.101	36.7967	44.11
fine	3	Straw scattered	75	3	189	2013-01-16	2013-03-31	9.351	0.866	0.599333	1.141	36.7967	45.47
fine	3	Straw mixed in	75	1	190	2013-01-16	2013-03-31	9.351	0.916	0.599333	1.301	36.7967	44.3
fine	3	Straw mixed in	75	2	191	2013-01-16	2013-03-31	9.351	0.57	0.599333	1.471	36.7967	46.4
fine	3	Straw mixed in	75	3	192	2013-01-16	2013-03-31	9.351	0.849	0.599333	1.154	36.7967	46.25
fine	3	Control	75	1	193	2013-01-16	2013-03-31	9.351	0.888	0.599333	1.331	36.7967	45.85
fine	3	Control	75	2	194	2013-01-16	2013-03-31	9.351	0.9	0.599333	1.313	36.7967	46.72
fine	3	Control	75	3	195	2013-01-16	2013-03-31	9.351	0.715	0.599333	1.479	36.7967	47.07
fine	4	Ash scattered	75	1	196	2013-01-16	2013-03-31	9.351	0.714	0.599333	1.406	36.7967	46.53
fine	4	Ash scattered	75	2	197	2013-01-16	2013-03-31	9.351	0.948	0.599333	1.441	36.7967	46.63
fine	4	Ash scattered	75	3	198	2013-01-16	2013-03-31	9.351	0.966	0.599333	1.356	36.7967	45.74
fine	4	Ash mixed in	75	1	199	2013-01-16	2013-03-31	9.351	0.795	0.599333	1.735	36.7967	46.37
fine	4	Ash mixed in	75	2	200	2013-01-16	2013-03-31	9.351	1.019	0.599333	1.535	36.7967	45.87
fine	4	Ash mixed in	75	3	201	2013-01-16	2013-03-31	9.351	1.151	0.599333	1.249	36.7967	46.77
fine	4	Straw scattered	75	1	202	2013-01-16	2013-03-31	9.351	1.102	0.599333	1.601	36.7967	45.48
fine	4	Straw scattered	75	2	203	2013-01-16	2013-03-31	9.351	1.117	0.599333	1.221	36.7967	44.33
fine	4	Straw scattered	75	3	204	2013-01-16	2013-03-31	9.351	0.867	0.599333	1.316	36.7967	45.06
fine	4	Straw mixed in	75	1	205	2013-01-16	2013-03-31	9.351	0.873	0.599333	1.187	36.7967	44.68
fine	4	Straw mixed in	75	2	206	2013-01-16	2013-03-31	9.351	0.969	0.599333	1.417	36.7967	44.25
fine	4	Straw mixed in	75	3	207	2013-01-16	2013-03-31	9.351	0.509	0.599333	1.367	36.7967	46.39
fine	4	Control	75	1	208	2013-01-16	2013-03-31	9.351	1.103	0.599333	1.31	36.7967	45.85
fine	4	Control	75	2	209	2013-01-16	2013-03-31	9.351	0.809	0.599333	1.696	36.7967	45.86
fine	4	Control	75	3	210	2013-01-16	2013-03-31	9.351	1.095	0.599333	1.19	36.7967	45.15
fine	5	Ash scattered	75	1	211	2013-01-16	2013-03-31	9.351	0.675	0.599333	1.583	36.7967	46.29
fine	5	Ash scattered	75	2	212	2013-01-16	2013-03-31	9.351	0.707	0.599333	1.731	36.7967	47.42
fine	5	Ash scattered	75	3	213	2013-01-16	2013-03-31	9.351	0.9	0.599333	1.302	36.7967	46.4
fine	5	Ash mixed in	75	1	214	2013-01-16	2013-03-31	9.351	1.002	0.599333	1.29	36.7967	45.88
fine	5	Ash mixed in	75	2	215	2013-01-16	2013-03-31	9.351	1.102	0.599333	0.964	36.7967	45.97
fine	5	Ash mixed in	75	3	216	2013-01-16	2013-03-31	9.351	1.222	0.599333	1.044	36.7967	46.22
fine	5	Straw scattered	75	1	217	2013-01-16	2013-03-31	9.351	0.718	0.599333	1.579	36.7967	46.44
fine	5	Straw scattered	75	2	218	2013-01-16	2013-03-31	9.351	1.124	0.599333	0.961	36.7967	45.61
fine	5	Straw scattered	75	3	219	2013-01-16	2013-03-31	9.351	0.931	0.599333	1.627	36.7967	45.46
fine	5	Straw mixed in	75	1	220	2013-01-16	2013-03-31	9.351	1.022	0.599333	1.288	36.7967	44.39
fine	5	Straw mixed in	75	2	221	2013-01-16	2013-03-31	9.351	0.988	0.599333	1.196	36.7967	46.48
fine	5	Straw mixed in	75	3	222	2013-01-16	2013-03-31	9.351	0.935	0.599333	0.938	36.7967	46.19
fine	5	Control	75	1	223	2013-01-16	2013-03-31	9.351	0.784	0.599333	1.441	36.7967	45.97
fine	5	Control	75	2	224	2013-01-16	2013-03-31	9.351	0.657	0.599333	1.389	36.7967	45.92
fine	5	Control	75	3	225	2013-01-16	2013-03-31	9.351	1.092	0.599333	1.185	36.7967	46.09

## Sheet: Aquatic Fauna Abundances
Block	Treatment	Days after setting of litterbags	Ostracoda	Nematoda	Annelida	Chironomidae Larvae	Coleoptera Larvae	Corixidae	Zygoptera Larvae	Notonectidae	Copepoda	Mollusca	Ceratopogonidae Larvae	Naucoridae	Coleoptera (Imago)	Anisoptera Larvae	Cladocera	Ephemeroptera Larvae	Culicidae Larvae	indet. Nematocera Larvae	Brachycera Larvae	Plecoptera Larvae
1	Ash scattered	50	122	108	12	0	4	2	0	1	5	8	0	5	1	0	0	0	0	0	0	0
1	Ash mixed in	50	80	150	73	3	2	13	2	8	3	4	1	0	0	0	0	0	0	0	0	0
1	Straw scattered	50	147	562	276	5	4	2	1	4	24	15	6	4	3	1	10	1	2	0	0	0
1	Straw mixed in	50	194	315	210	2	1	6	0	9	37	1	0	4	0	0	0	0	0	0	0	0
1	Control	50	28	30	17	3	0	0	0	5	2	4	0	3	0	0	0	0	0	0	0	0
2	Ash scattered	50	118	372	63	0	0	1	0	3	16	4	1	8	0	0	2	0	0	0	0	0
2	Ash mixed in	50	67	130	41	0	0	0	0	0	9	3	0	3	1	0	1	0	0	0	0	0
2	Straw scattered	50	369	1704	490	6	1	1	0	0	49	21	7	7	1	0	18	0	0	0	0	0
2	Straw mixed in	50	139	586	130	8	1	1	0	4	15	21	4	0	2	0	3	0	0	2	0	0
2	Control	50	79	330	69	0	4	4	0	0	19	1	0	3	0	0	1	0	0	0	0	0
3	Ash scattered	50	106	257	240	3	0	0	0	0	21	14	0	4	1	0	12	0	0	0	0	0
3	Ash mixed in	50	52	74	21	1	0	0	1	1	4	6	0	5	0	0	7	0	0	0	0	0
3	Straw scattered	50	262	592	388	5	2	2	1	0	16	9	4	1	3	0	10	2	0	0	1	0
3	Straw mixed in	50	115	307	145	5	0	1	0	7	2	5	0	5	2	0	8	0	0	0	0	0
3	Control	50	224	228	210	2	5	2	0	1	13	4	2	3	0	0	6	0	0	0	0	0
4	Ash scattered	50	46	158	33	2	1	0	1	0	4	4	1	3	1	0	1	0	0	0	0	0
4	Ash mixed in	50	147	144	108	5	1	0	0	2	5	1	0	3	0	0	2	0	0	0	0	0
4	Straw scattered	50	65	684	83	1	0	0	0	0	10	3	0	5	1	0	11	0	0	0	0	0
4	Straw mixed in	50	226	1165	1001	1	3	1	0	0	12	8	9	2	2	0	8	0	0	0	0	1
4	Control	50	200	419	36	2	2	6	0	0	13	6	0	4	0	0	1	0	0	0	0	0
5	Ash scattered	50	63	151	67	1	0	5	0	0	4	0	0	1	0	0	2	0	0	1	0	0
5	Ash mixed in	50	145	280	78	3	3	6	1	0	2	3	0	2	0	0	0	0	0	0	0	0
5	Straw scattered	50	118	264	127	3	0	0	0	6	5	3	0	9	2	0	0	0	0	0	0	0
5	Straw mixed in	50	116	197	151	0	1	2	0	0	0	5	0	3	1	0	0	0	0	0	0	0
5	Control	50	82	113	21	2	4	1	1	0	3	0	0	2	0	0	0	0	0	0	0	0

## Sheet: Soil Meso Fauna Abundances
Block	Treatment	Days after setting of litterbags	Fresh weight of soil core (g)	Soil water content (%)	Area of soil core (m2)	pH value of soil	Organic carbon content of soil (%)	Acari	Meso fauna not determined	Enchytraeidae
1	Ash scattered	25	396.8	62.987	0.0019635	5.35	NA	15	2	0
2	Ash scattered	25	268.6	80	0.0019635	5.5	7.8535	9	0	1
3	Ash scattered	25	446.3	61.8123	0.0019635	5.46	7.34574	21	0	0
4	Ash scattered	25	351.8	61.9355	0.0019635	5.47	8.71494	22	1	0
5	Ash scattered	25	289.8	69.1525	0.0019635	5.64	7.98231	9	0	0
1	Ash mixed in	25	327.5	52.6154	0.0019635	5.36	7.23664	9	2	6
2	Ash mixed in	25	446.8	61.4148	0.0019635	5.42	8.05107	22	1	0
3	Ash mixed in	25	396.7	69.2568	0.0019635	5.6	7.71866	15	1	3
4	Ash mixed in	25	278.4	62.9508	0.0019635	5.04	7.74307	7	2	2
5	Ash mixed in	25	336.2	60.8974	0.0019635	5.48	7.79817	12	0	0
1	Straw scattered	25	403.3	67.1141	0.0019635	5.67	8.7051	20	3	15
2	Straw scattered	25	470.7	70.1695	0.0019635	5.92	7.82797	25	6	19
3	Straw scattered	25	327.5	75	0.0019635	5.66	7.50106	14	0	0
4	Straw scattered	25	259.3	62.701	0.0019635	5.24	8.42214	11	1	0
5	Straw scattered	25	366	40	0.0019635	5.63	5.91851	35	3	0
1	Straw mixed in	25	970.4	52.7439	0.0019635	5.68	7.16122	7	0	2
2	Straw mixed in	25	429.5	65.894	0.0019635	5.33	7.56344	15	1	1
3	Straw mixed in	25	517.9	61.6883	0.0019635	5.88	7.42774	11	4	0
4	Straw mixed in	25	348.6	66.3366	0.0019635	NA	8.09101	14	2	4
5	Straw mixed in	25	297.5	74.4755	0.0019635	5.73	7.511	11	3	1
1	Control	25	407.5	63.9344	0.0019635	5.66	7.36887	11	2	1
2	Control	25	346.9	67.5585	0.0019635	5.73	7.82484	8	0	31
3	Control	25	441	56.7398	0.0019635	5.49	7.72006	11	1	0
4	Control	25	254.2	85.6089	0.0019635	5.68	7.80244	11	2	9
5	Control	25	342.1	57.7778	0.0019635	5.29	7.88633	15	0	0
1	Ash scattered	75	227.4	60.3226	0.0019635	5.97	NA	3	2	0
2	Ash scattered	75	232.9	65.4839	0.0019635	5.37	6.93599	12	0	0
3	Ash scattered	75	193.5	73.2203	0.0019635	5.26	7.00585	4	0	0
4	Ash scattered	75	286.3	68.6007	0.0019635	5.59	6.99815	1	5	0
5	Ash scattered	75	310.5	63.6076	0.0019635	5.58	7.05338	5	2	0
1	Ash mixed in	75	256.6	86.7159	0.0019635	5.37	7.1824	13	0	2
2	Ash mixed in	75	286.4	53.2308	0.0019635	6.16	6.17951	2	24	0
3	Ash mixed in	75	326.4	50.7331	0.0019635	6.3	6.41406	0	18	0
4	Ash mixed in	75	273.2	73.9726	0.0019635	5.24	7.59164	2	0	0
5	Ash mixed in	75	241	63.6905	0.0019635	5.51	6.77146	4	7	0
1	Straw scattered	75	230.1	96.6292	0.0019635	5.72	7.37121	5	0	0
2	Straw scattered	75	261.4	63.5783	0.0019635	6.26	6.60163	3	6	0
3	Straw scattered	75	265.3	62.701	0.0019635	5.44	6.82938	2	4	0
4	Straw scattered	75	137.7	77.3852	0.0019635	5.43	8.0427	1	3	0
5	Straw scattered	75	177.1	57.2327	0.0019635	5.76	6.88131	1	4	0
1	Straw mixed in	75	241.8	65.0327	0.0019635	6.03	6.82174	0	7	0
2	Straw mixed in	75	263.1	70.9571	0.0019635	5.17	7.5751	3	0	0
3	Straw mixed in	75	323.5	73.9583	0.0019635	5.6	7.16704	3	1	0
4	Straw mixed in	75	200.5	65.8784	0.0019635	5.44	6.95484	1	11	0
5	Straw mixed in	75	253.2	NA	0.0019635	NA	NA	3	0	0
1	Control	75	258.4	41.1444	0.0019635	6.29	6.43956	0	0	1
2	Control	75	328.1	67.5159	0.0019635	6.36	6.38624	2	6	0
3	Control	75	344.9	56.9697	0.0019635	5.86	6.69736	5	8	0
4	Control	75	228.9	64.1026	0.0019635	5.21	6.86636	7	0	0
5	Control	75	255	60	0.0019635	5.7	6.77088	9	1	0

## Sheet: Soil Nematoda Abundances
Block	Treatment	Days after setting of litterbags	Fresh weight of soil core (g)	Soil water content (%)	Area of soil core (m2)	pH value of soil	Organic carbon content of soil (%)	Panagrolaimus	Acrobeles	Cephalobus	Plectus	Aphelenchoides	Ditylenchus	Helicotylenchus	Hirshamanniella	Pratylenchus	Dorylaimus	Eudorylaimus	Prodorylaimus	Mononchus	Longidorus
1	Ash scattered	25	278.9	62.987	0.0015708	5.35	NA	0	0	0	0	0	0	0	43.9	0	0	0	0	0	0
2	Ash scattered	25	280.8	80	0.0015708	5.5	7.8535	12	0	0	0	0	0	0	54	6	0	0	0	0	0
3	Ash scattered	25	234.4	61.8123	0.0015708	5.46	7.34574	9.7	0	0	0	0	9.7	0	33.8	0	0	0	4.8	0	0
4	Ash scattered	25	321.7	61.9355	0.0015708	5.47	8.71494	0	0	0	0	0	0	0	28	0	0	0	0	0	0
5	Ash scattered	25	229.2	69.1525	0.0015708	5.64	7.98231	11	0	0	0	0	55	0	0	0	11	0	0	0	0
1	Ash mixed in	25	275.9	52.6154	0.0015708	5.36	7.23664	0	0	0	0	0	67.5	0	0	0	13.5	0	0	0	0
2	Ash mixed in	25	275.2	61.4148	0.0015708	5.42	8.05107	9.7	0	0	0	0	14.6	0	34	4.9	0	0	4.9	0	0
3	Ash mixed in	25	279.2	69.2568	0.0015708	5.6	7.71866	10.2	0	0	0	0	0	0	50.8	0	0	0	0	0	0
4	Ash mixed in	25	261.5	62.9508	0.0015708	5.04	7.74307	16.7	0	0	0	8.4	50.2	0	0	0	0	0	16.7	0	0
5	Ash mixed in	25	218.1	60.8974	0.0015708	5.48	7.79817	6.4	0	0	0	0	9.6	0	25.7	0	0	0	3.2	0	0
1	Straw scattered	25	294.9	67.1141	0.0015708	5.67	8.7051	8	0	0	0	0	24	0	48	0	0	0	8	0	0
2	Straw scattered	25	279.5	70.1695	0.0015708	5.92	7.82797	9.3	0	0	0	0	9.3	9.3	55.9	0	0	0	0	0	0
3	Straw scattered	25	253.4	75	0.0015708	5.66	7.50106	0	0	0	0	0	56	14	0	0	42	0	0	0	0
4	Straw scattered	25	266.4	62.701	0.0015708	5.24	8.42214	0	0	0	0	0	12.8	0	0	0	0	0	19.2	0	0
5	Straw scattered	25	240.3	40	0.0015708	5.63	5.91851	0	0	0	0	0	33.6	0	0	0	0	0	8.4	0	0
1	Straw mixed in	25	284.6	52.7439	0.0015708	5.68	7.16122	7.4	0	0	0	0	37.1	0	0	0	7.4	0	0	0	0
2	Straw mixed in	25	325.7	65.894	0.0015708	5.33	7.56344	0	0	0	0	0	45.6	0	0	0	11.4	0	0	0	0
3	Straw mixed in	25	284.4	61.6883	0.0015708	5.88	7.42774	9.6	0	0	0	0	28.8	0	0	0	0	0	9.6	0	0
4	Straw mixed in	25	258.8	66.3366	0.0015708	NA	8.09101	21	0	0	0	0	42	0	0	0	0	0	21	0	0
5	Straw mixed in	25	271.1	74.4755	0.0015708	5.73	7.511	6	0	0	6	0	18	0	0	0	0	0	6	0	0
1	Control	25	252.9	63.9344	0.0015708	5.66	7.36887	7.6	0	0	0	0	38.1	0	0	0	15.3	0	0	0	0
2	Control	25	258.9	67.5585	0.0015708	5.73	7.82484	5.8	0	0	0	0	5.8	0	17.4	0	0	0	0	0	0
3	Control	25	256.5	56.7398	0.0015708	5.49	7.72006	0	0	0	0	0	9.3	0	27.8	0	0	0	0	0	0
4	Control	25	282.4	85.6089	0.0015708	5.68	7.80244	0	0	0	0	0	0	0	23.3	0	0	0	0	0	11.7
5	Control	25	269.1	57.7778	0.0015708	5.29	7.88633	0	0	0	0	0	28	0	0	0	0	0	0	0	0
1	Ash scattered	75	302.5	60.3226	0.0015708	5.97	NA	0	7.3	0	0	0	0	0	7.3	0	0	0	7.3	0	0
2	Ash scattered	75	283.3	65.4839	0.0015708	5.37	6.93599	0	0	0	0	0	0	0	20.5	0	0	0	20.5	0	0
3	Ash scattered	75	255.6	73.2203	0.0015708	5.26	7.00585	0	0	17	0	0	0	0	34	0	0	0	17	0	0
4	Ash scattered	75	296.7	68.6007	0.0015708	5.59	6.99815	0	0	0	0	0	0	0	36	0	0	0	18	0	0
5	Ash scattered	75	276.7	63.6076	0.0015708	5.58	7.05338	0	0	0	0	0	0	0	5	0	0	0	10	0	0
1	Ash mixed in	75	247.1	86.7159	0.0015708	5.37	7.1824	0	0	0	0	0	0	0	15.5	0	0	0	15.5	0	0
2	Ash mixed in	75	317.3	53.2308	0.0015708	6.16	6.17951	0	0	0	0	0	0	0	34	0	0	0	17	0	0
3	Ash mixed in	75	311.5	50.7331	0.0015708	6.3	6.41406	0	0	10.3	0	0	0	0	20.7	0	0	0	0	0	0
4	Ash mixed in	75	234.1	73.9726	0.0015708	5.24	7.59164	8.25	0	0	0	0	0	0	8.25	0	0	0	16.5	0	0
5	Ash mixed in	75	465.7	63.6905	0.0015708	5.51	6.77146	18.5	0	0	0	0	0	0	37	0	0	0	18.5	0	0
1	Straw scattered	75	369.5	96.6292	0.0015708	5.72	7.37121	9	0	0	0	0	0	0	9	0	0	0	9	0	0
2	Straw scattered	75	298.2	63.5783	0.0015708	6.26	6.60163	18.25	0	0	0	0	0	0	36.5	0	0	0	18.25	0	0
3	Straw scattered	75	294.8	62.701	0.0015708	5.44	6.82938	0	0	0	0	0	0	0	6.3	0	0	0	12.7	0	0
4	Straw scattered	75	261.2	77.3852	0.0015708	5.43	8.0427	12.2	0	0	0	0	0	0	24.4	0	0	0	24.4	0	0
5	Straw scattered	75	304.7	57.2327	0.0015708	5.76	6.88131	0	0	14.25	0	0	0	0	28.5	0	0	0	14.25	0	0
1	Straw mixed in	75	296.9	65.0327	0.0015708	6.03	6.82174	0	0	0	0	0	0	0	7.6	0	0	0	30.4	0	0
2	Straw mixed in	75	292.6	70.9571	0.0015708	5.17	7.5751	0	0	0	0	0	0	0	17.5	0	0	0	17.5	0	0
3	Straw mixed in	75	260.5	73.9583	0.0015708	5.6	7.16704	13.5	0	0	0	0	0	0	27	0	0	13.5	27	0	0
4	Straw mixed in	75	333.5	65.8784	0.0015708	5.44	6.95484	0	0	0	0	0	0	0	24	0	0	0	24	0	0
5	Straw mixed in	75	324.6	NA	0.0015708	NA	NA	0	7	0	0	0	0	0	7	0	0	0	14	0	0
1	Control	75	309	41.1444	0.0015708	6.29	6.43956	14.2	0	0	0	0	0	0	28.4	0	0	0	28.4	0	0
2	Control	75	287.3	67.5159	0.0015708	6.36	6.38624	0	0	0	0	0	0	0	28	0	0	0	14	0	0
3	Control	75	304.3	56.9697	0.0015708	5.86	6.69736	0	0	0	0	0	0	0	23.5	0	0	0	11.75	11.75	0
4	Control	75	275.5	64.1026	0.0015708	5.21	6.86636	0	0	0	0	0	0	0	5	0	0	0	10	0	0
5	Control	75	273.9	60	0.0015708	5.7	6.77088	0	0	0	0	0	0	0	17.2	0	0	8.6	17.2	0	0

## Sheet: Yield
Block	Treatment	Adjusted grain weight at 14 % moisture content	Yield (tons per hectar)
1	Ash scattered	4.68558	9.37116
2	Ash scattered	5.11047	10.2209
3	Ash scattered	4.50233	9.00465
4	Ash scattered	4.10698	8.21395
5	Ash scattered	5.10465	10.2093
1	Ash mixed in	4.10233	8.20465
2	Ash mixed in	3.90605	7.81209
3	Ash mixed in	4.30744	8.61488
4	Ash mixed in	4.08837	8.17674
5	Ash mixed in	4.87814	9.75628
1	Straw scattered	4.08837	8.17674
2	Straw scattered	4.10698	8.21395
3	Straw scattered	4.06977	8.13953
4	Straw scattered	4.09302	8.18605
5	Straw scattered	3.66279	7.32558
1	Straw mixed in	4.26349	8.52698
2	Straw mixed in	4.10698	8.21395
3	Straw mixed in	4.07907	8.15814
4	Straw mixed in	4.10698	8.21395
5	Straw mixed in	4.46651	8.93302
1	Control	4.68023	9.36047
2	Control	4.27814	8.55628
3	Control	4.50233	9.00465
4	Control	5.09884	10.1977
5	Control	4.09302	8.18605
